# Supplementary material for: Fe3O4/reduced graphene oxide with enhanced electrochemical performance towards lithium storage
Source: Royal Society of Chemistry journal article supplement (doi:10.1039/c3ta15426b), 2014-01-01
Supplement: c3ta15426b1.pdf [file c3ta15426b1.pdf]

**Structural investigation of Fe<sub>3</sub>O<sub>4</sub>/reduced graphene oxide with  
enhanced electrochemical performances towards lithium storage**

Chaolun Liang,<sup>ab</sup> Teng Zhai,<sup>a</sup> Wang Wang,<sup>a</sup> Jian Chen,<sup>b</sup> Wenxia Zhao,<sup>b</sup> Xihong  
Lu,<sup>\*a</sup> and Yexiang Tong<sup>\*a</sup>

*<sup>a</sup> KLGHEI of Environment and Energy Chemistry, MOE of the Key Laboratory of  
Bioinorganic and Synthetic Chemistry, School of Chemistry and Chemical  
Engineering, Sun Yat-Sen University, Guangzhou 510275, People's Republic of  
China. E-mail: chedhx@mail.sysu.edu.cn; luxh6@mail.sysu.edu.cn; Fax: +86-  
20-84112245; Tel: +86-20-84110071*

*<sup>b</sup> Instrumental Analysis and Research Centre, Sun Yat-Sen University, Guangzhou  
510275, People's Republic of China.*

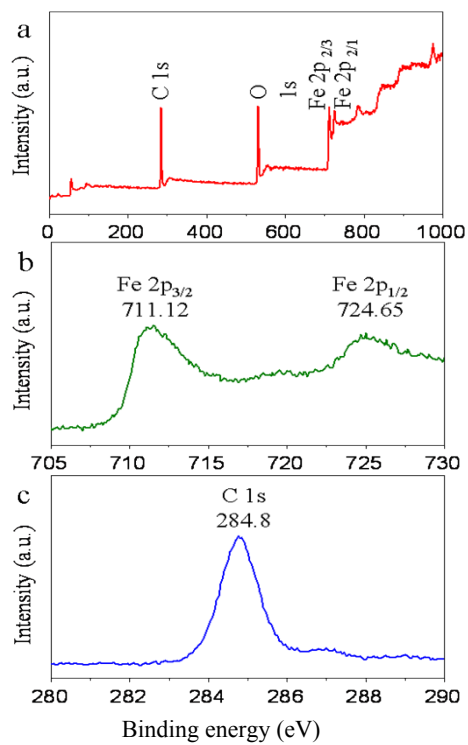

**Fig. S1** (a) XPS survey spectrum, (b) Fe 2p core level XPS spectrum and C 1s core level XPS spectrum of Fe<sub>3</sub>O<sub>4</sub>/RGO composites.

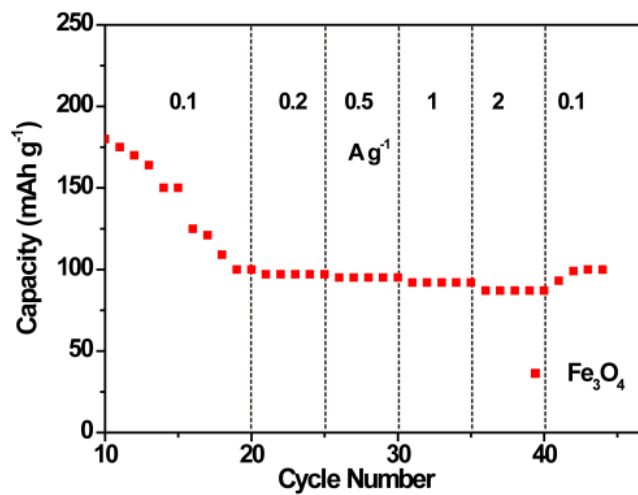

**Fig. S2** Charge/discharge capacity of the Fe<sub>3</sub>O<sub>4</sub>/RGO anode at various rates for 40 cycles.

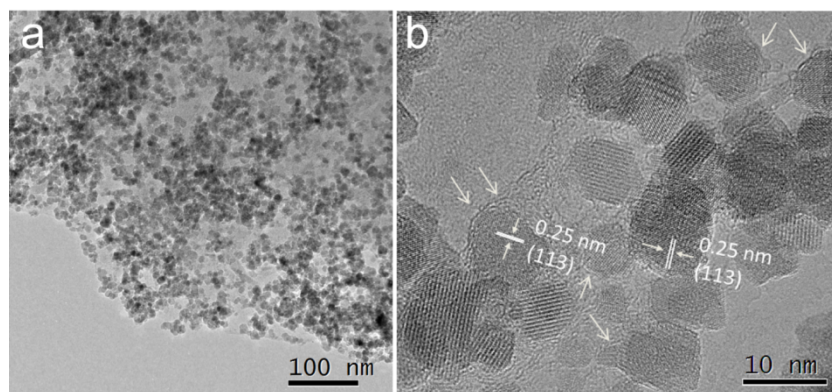

**Fig. S3** (a) Typical TEM image and (b) HRTEM image of  $\text{Fe}_3\text{O}_4/\text{RGO-2}$  composites with a mass loading of  $0.81 \text{ mg cm}^{-2}$ . RGO sheets are covered with a high density of  $\text{Fe}_3\text{O}_4$  NPs, and some NPs have aggregated together. However, some isolated particles with active surfaces attached by carbon layers still can be observed in the HRTEM image (marked by white arrows), indicating that RGO still play the important role of protecting the highly active surfaces of the NPs.

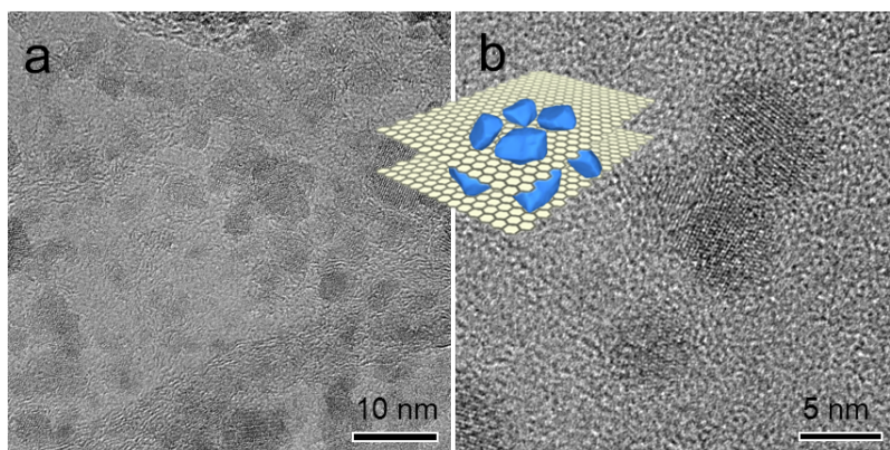

**Fig. S4** Morphological features of the  $\text{Fe}_3\text{O}_4/\text{RGO}$  composites. (a) TEM image. (b) HRTEM image.

The inset is a possible schematic illustrating the uniformly-dispersion of  $\text{Fe}_3\text{O}_4$  NPs anchored on RGO.
